# Supplementary material for: Determination of trace amount of Cu2+ with a multi-responsive colorimetric and reversible chemosensor
Source: Royal Society of Chemistry journal article supplement (doi:10.1039/c3an00741c), 2013-01-01
Supplement: c3an00741c.pdf [file c3an00741c.pdf]

## Supporting information

# Determination of Trace Amount of Cu<sup>2+</sup> with a Multi-responsive Colorimetric and Reversible Chemosensor

Yong-Sheng Mi,<sup>a,b</sup> Zhong Cao,<sup>\*b</sup> Ya-Ting Chen,<sup>a</sup> Qiu-Fen Xie,<sup>a</sup> Ying-Ying Xu,<sup>a</sup>  
Yong-Feng Luo,<sup>b</sup> Jian-Jian Shi,<sup>c</sup> and Jian-Nan Xiang<sup>\*a</sup>

## Characterization Spectra and Data of Compound 1

Yield: 0.49 g (75%). m.p. 162-163 °C.

<sup>1</sup>H NMR (400 MHz, CDCl<sub>3</sub>), δ (ppm): 8.217 (1 H, s, CH=N), 7.990 (1 H, d, J=8.4 Hz, Rh-H), 7.460 (2 H, t, J=6.6 Hz, Rh-H), 7.090 (1 H, d, J=8 Hz, Rh-H), 6.571 (2 H, s, Rh-H), 6.461 (2 H, d, J=2.4 Hz, Rh-H), 6.275 (2 H, q, J=2.6 Hz, Rh-H), 4.501 (2 H, s, Cp-H), 4.216 (2 H, s, Cp-H), 3.832 (5 H, s, Cp-H), 3.316 (8 H, dd, J=7.2 Hz, J=14.4 Hz, CH<sub>2</sub>), 1.136 (12 H, t, J=7.0 Hz, CH<sub>3</sub>); <sup>13</sup>C NMR (100MHz, CDCl<sub>3</sub>), δ (ppm): 164.3, 153.0, 151.7, 148.9, 148.5, 132.9, 129.5, 128.1, 123.6, 123.2, 109.8, 108.1, 106.2, 97.8, 79.2, 69.9, 69.1, 67.9, 65.4, 44.3, 12.6; ESI-MS: *m/z* 653.3 for [1+H]<sup>+</sup>, HRMS (ES): *m/z* calcd for C<sub>39</sub>H<sub>40</sub>N<sub>4</sub>O<sub>2</sub>Fe: 652.2493 [M<sup>+</sup>]; found: 652.2495.

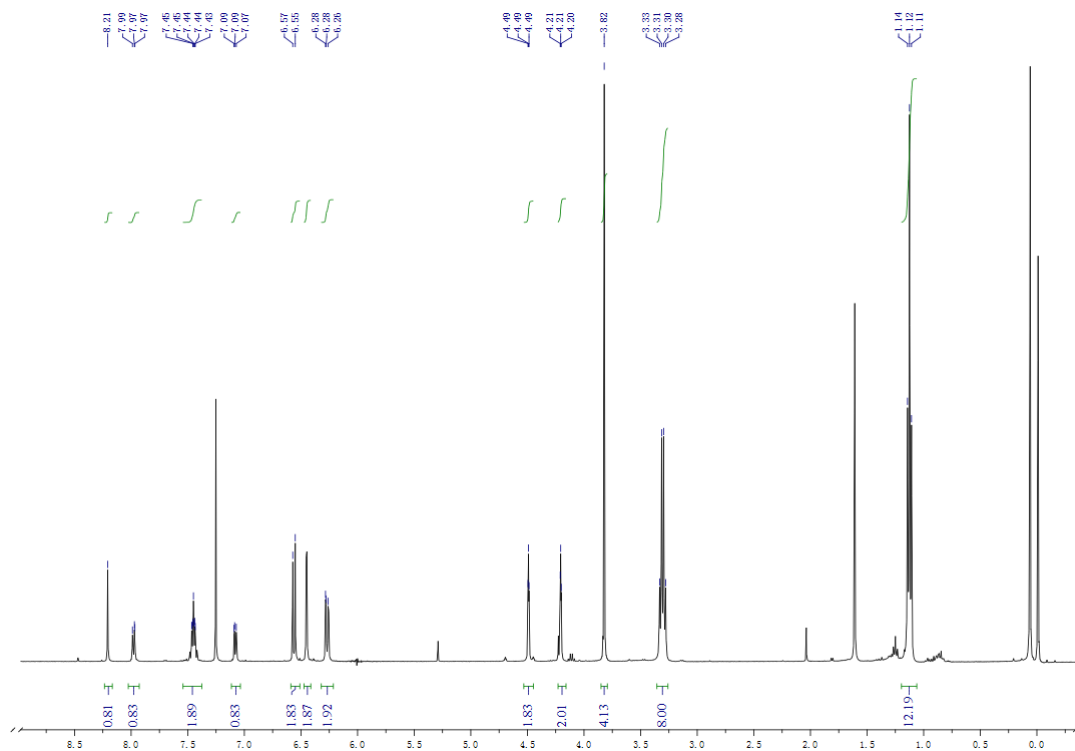

Fig. S1. <sup>1</sup>H NMR of compound 1

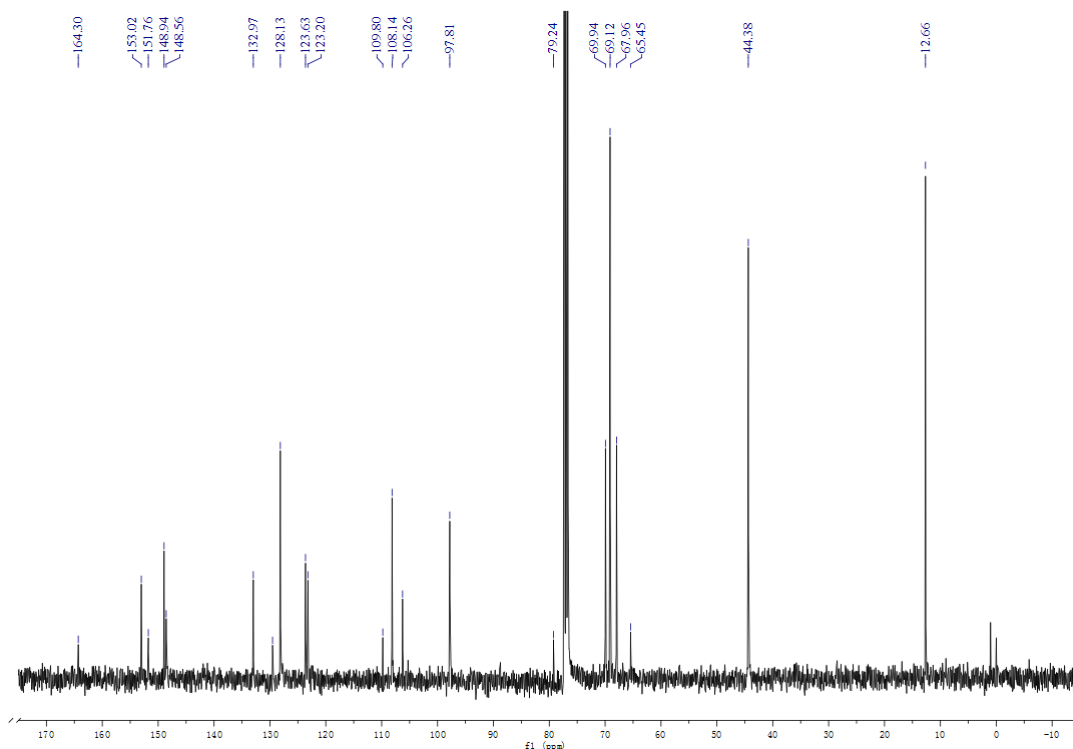

Fig. S2.  $^{13}\text{C}$  NMR of compound 1

myj-110704-652 #1 RT: 0.02 AV: 1 NL: 9.58E6  
T: + c ESI ms [100.00-2000.00]

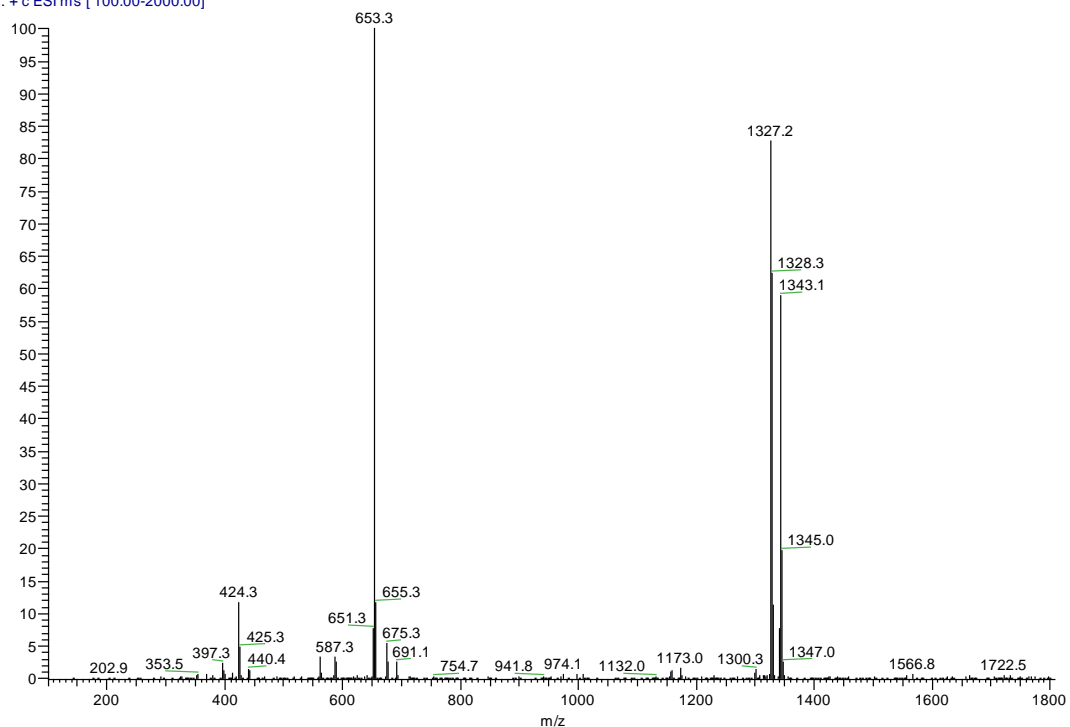

Fig. S3. ESI-MS of compound 1

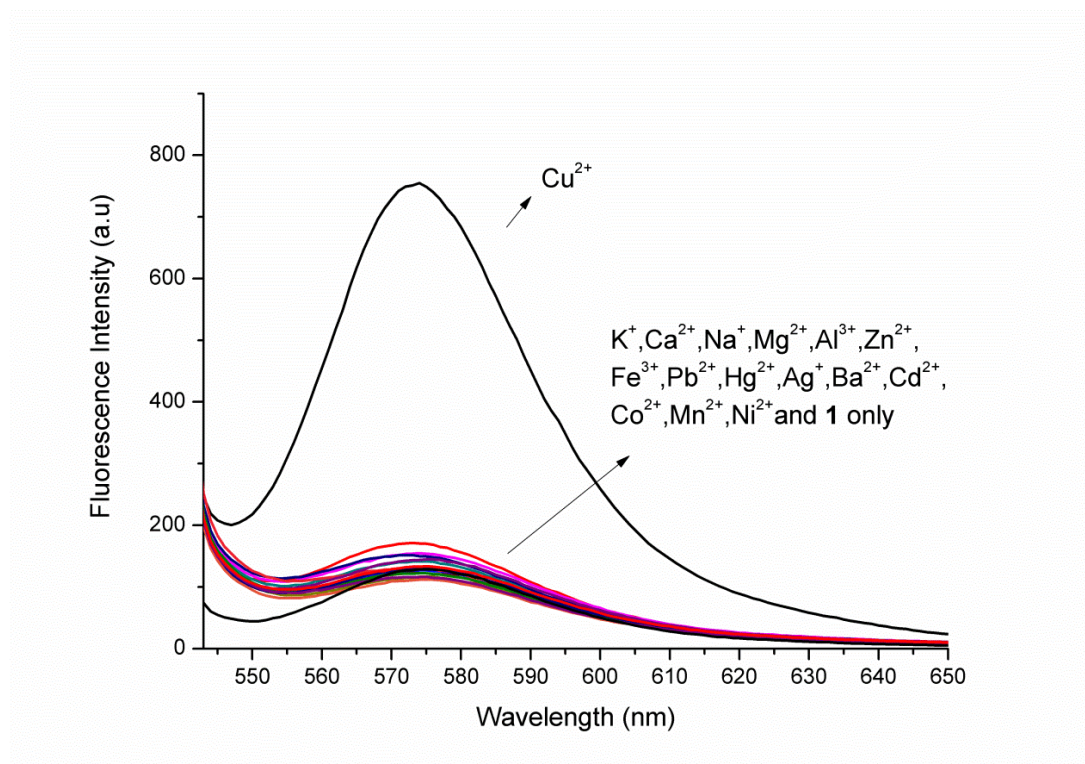

Fig. S4 Fluorescence spectra of compound **1** (20 μM) in CH<sub>3</sub>CN/HEPES (1:3, v/v, pH 7.1) in the presence of different metal ions (1 equiv.) under the excitation wavelength of 530 nm.

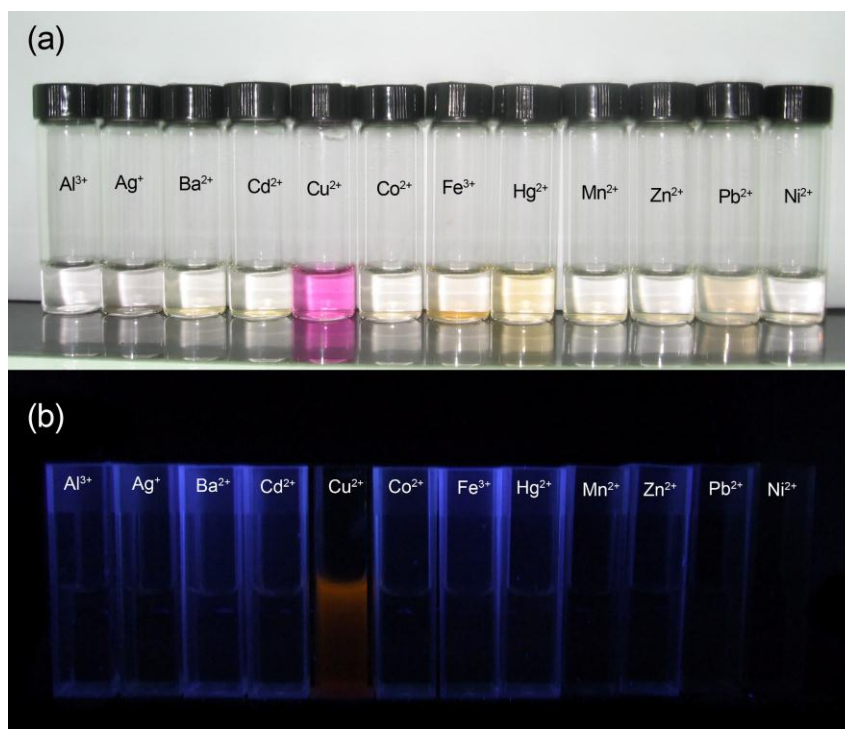

Fig. S5 (a) Visible color change of compound **1** with addition of various metal ions in CH<sub>3</sub>CN/HEPES (1/3, v/v) solution; (b) Fluorescence changes of compound **1** with addition of various metal ions in CH<sub>3</sub>CN/HEPES (1/3, v/v) solution under 365 nm lamp excitation. The concentration of compound **1** is 20 μM.

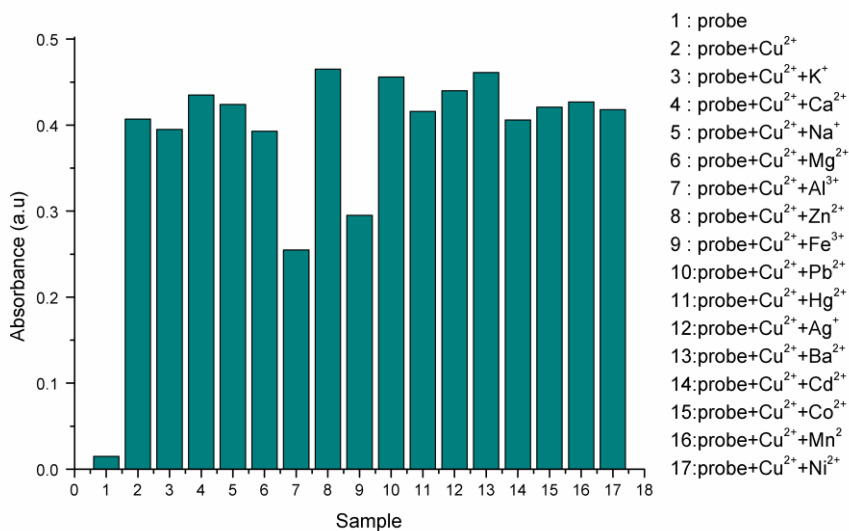

Fig. S6 The absorbance responses of **1** (50  $\mu$ M, CH<sub>3</sub>CN/HEPES, 1:1, v/v, pH 7.1) to Cu<sup>2+</sup> (2 equiv.) in the presence of other metal ions (4 equiv.)

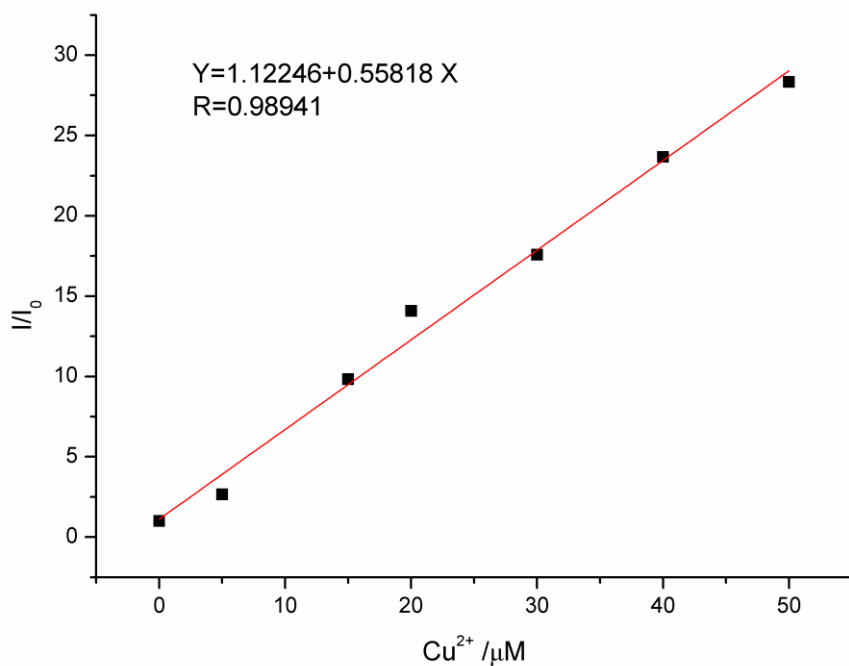

Fig. S7 Value of I/I<sub>0</sub> was proportional to the amount of Cu<sup>2+</sup> between 5-50  $\mu$ M with a good linear correlation.

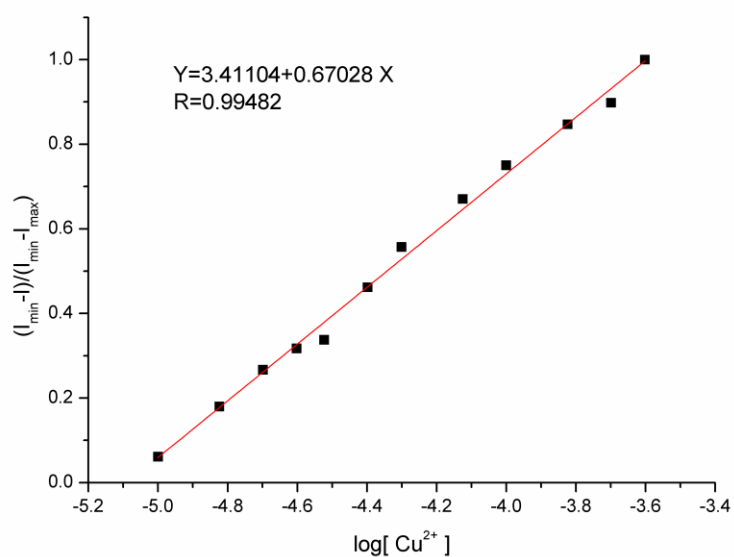

Fig. S8 Absorbance of **1** at different concentrations of  $\text{Cu}^{2+}$  added, normalized between the minimum absorbance and the maximum absorbance intensity. The detection limit was determined to be  $8.147 \times 10^{-6}$  M. <sup>a, b, c</sup>

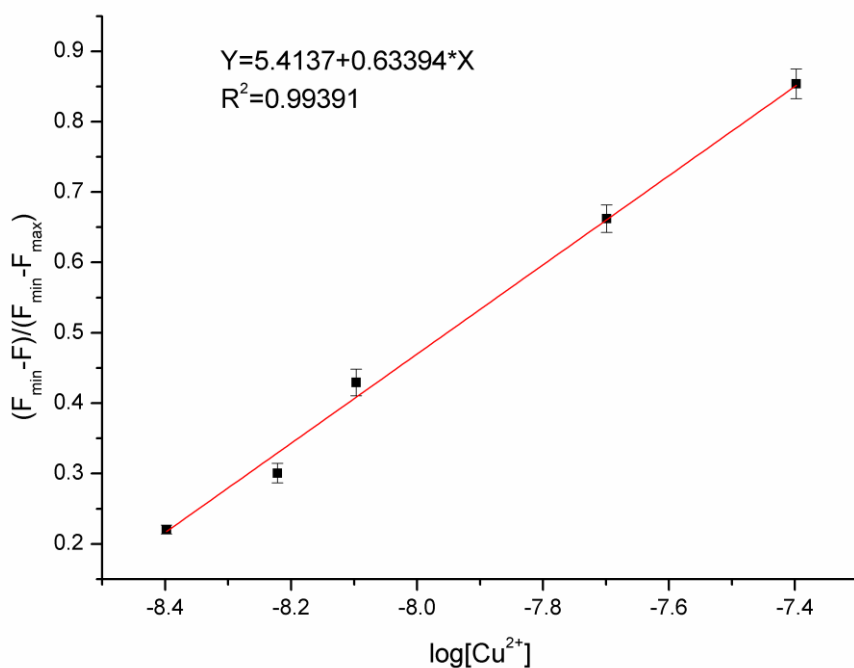

Fig. S9 Emission of **1** at different concentrations of  $\text{Cu}^{2+}$  added, normalized between the minimum emission and the maximum emission intensity with error bars that display three standard deviations. The detection limit was determined to be 2.0 nM. <sup>a, b, c, d</sup>

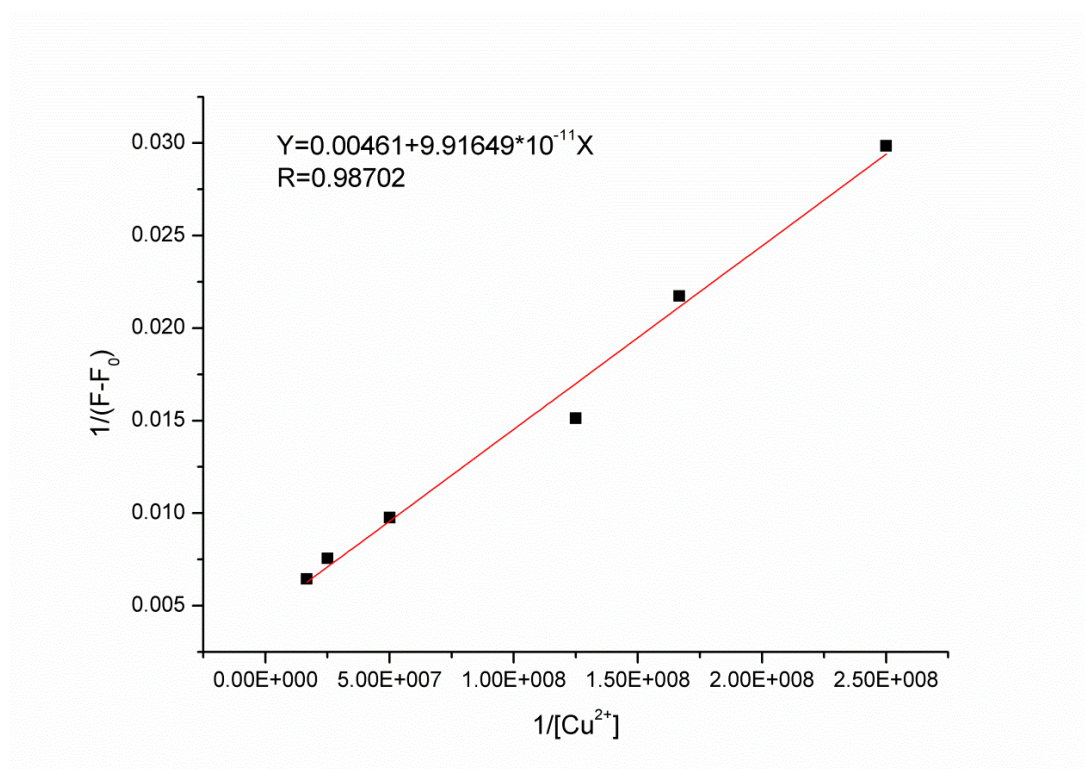

Fig. S10 Benesi-Hildebrand plot, the association constant of **1** with  $Cu^{2+}$ ,  $K=A/B=4.65 \times 10^7 M^{-1}$ .

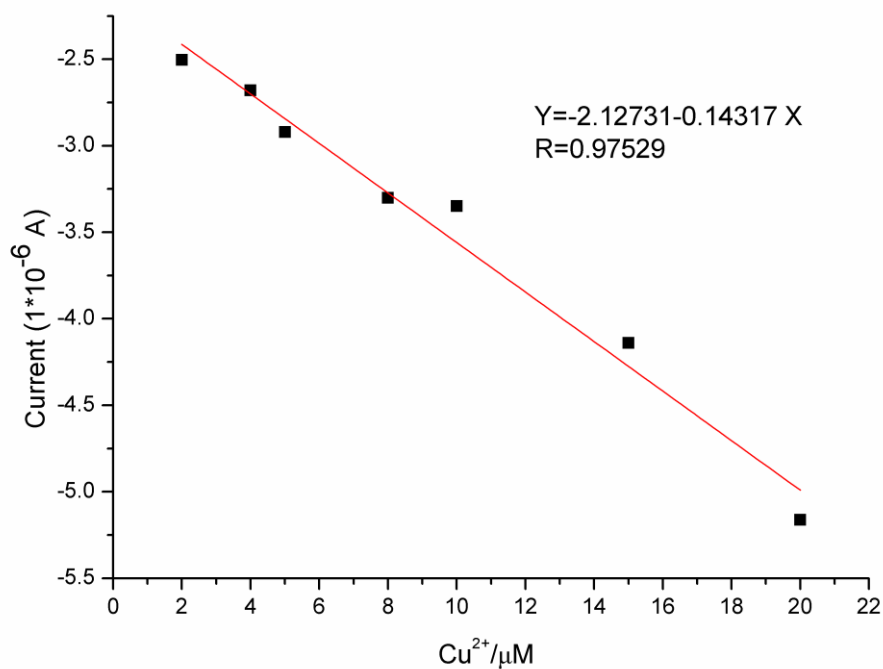

Fig. S11 Variation curve of the oxidation peak currents of free **1** ( $100 \mu M$ ) in aqueous solution ( $CH_3CN/H_2O$ , 7:3) upon the addition of  $Cu^{2+}$ .  $(n-Bu)_4NClO_4$  ( $0.1 M$ ) was used as supporting electrolyte. The scan rate was  $100 mV/s$ .

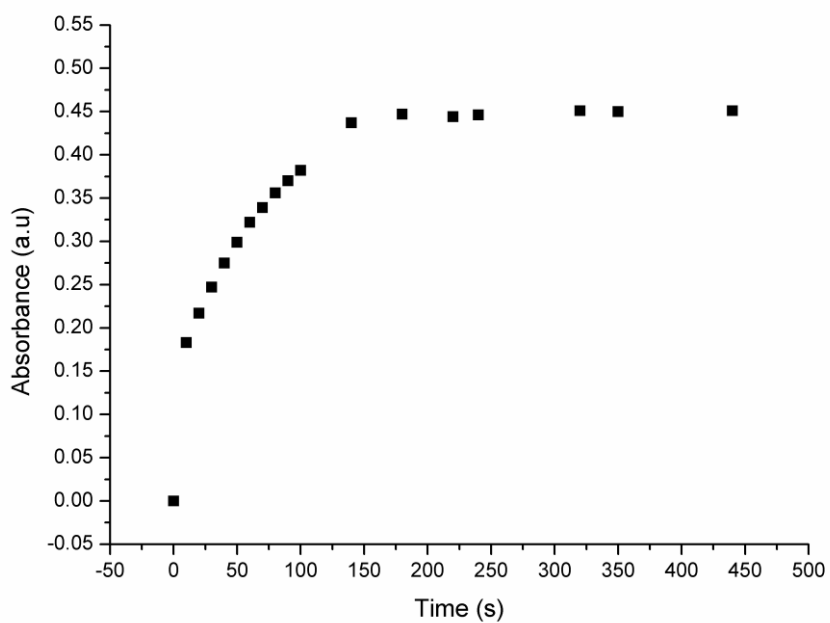

Fig. S12 Time course of compound **1** (50  $\mu\text{M}$ ) responding to  $\text{Cu}^{2+}$  (2 equiv.) in  $\text{CH}_3\text{CN}/\text{HEPES}$  (1:1, v/v, pH 7.1) solution.

**References:**

- (a) Lin, W., Yuan, L., Cao, Z., Feng, Y., Long, L., *Chem. Eur. J.* 2009, 15, 5096.
- (b) Shortreed, M., Kopelman, R., Kuhn, M., Hoyland, B., *Anal. Chem.* 1996, 68, 1414.
- (c) Kim, M. H., Jang, H. H., Yi, S., Chang, S. K., Han, M. S., *Chem. Commun.* 2009, 4838.
- (d) Hakonen, A., *Anal. Chem.* 2009, 81, 4555.
